# Supplementary material
Source: Royal Society of Chemistry journal article supplement (doi:10.1039/d6cc02063a)
Supplement: d6cc02063a1.pdf [file d6cc02063a1.pdf]

## Supporting Information

### An AIE-Based Fluorescent Probe for Selective and Sensitive Detection of N-Bromosuccinimide

#### Table of Contents

|                                   |    |
|-----------------------------------|----|
| Part I Experimental Section ..... | 2  |
| 1.1 General information .....     | 2  |
| 1.2 Synthesis of TPE-PTZ .....    | 3  |
| 1.3 Mechanism study .....         | 6  |
| 1.4 TD-DFT calculation .....      | 8  |
| Part II NMR spectra.....          | 12 |

## Part I Experimental Section

### 1.1 General information

<sup>1</sup>H NMR and <sup>13</sup>C NMR were recorded on Bruker-500 MHz Spectrometer (<sup>1</sup>H NMR: 500MHz, <sup>13</sup>C NMR: 125MHz). The chemical shifts ( $\delta$ ) and coupling constants ( $J$ ) were expressed in ppm and Hz respectively. The Photoluminescence (PL) spectra were obtained on Hitachi F-4600 Fluorescence Spectrometer. Commercially available compounds were used without further purification. The UV-vis spectra were obtained on Shimadzu UV-VIS-NIR Spectrophotometer (UV-2700). HRMS data were obtained on Waters Xevo G2-S QToF Mass Spectrometer. DLS measurements were performed on Zetasizer Nano Instrument. All solvents were purified according to the standard procedures unless otherwise noted.

## 1.2 Synthesis of TPE-PTZ

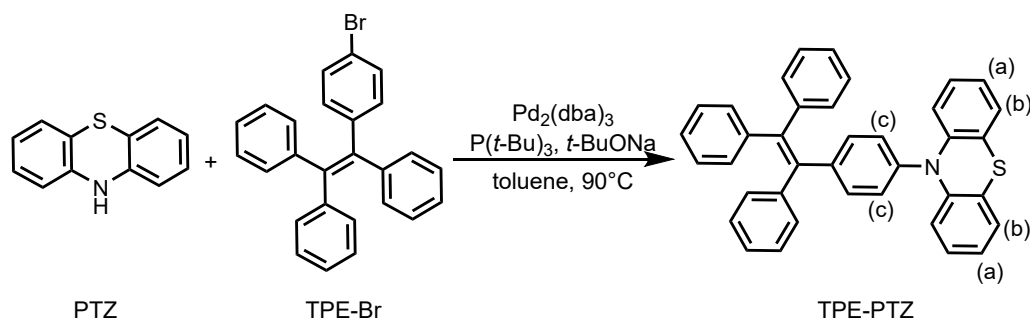

Scheme S1. Synthetic route of TPE-PTZ

Tris(dibenzylideneacetone)dipalladium(0) ( $\text{Pd}_2(\text{dba})_3$ ) (87 mg, 0.095 mmol) and tri-tert-butylphosphane ( $\text{P}(t\text{-Bu})_3$ ) (0.02 mL, 0.095 mmol) were dissolved in dry toluene (20 mL) under argon and stirred for 10 min at room temperature (preformation of the catalyst). The catalyst was then added to a mixture of 10H-phenothiazine (1.53 g, 7.66 mmol), TPE-Br (3.0 g, 7.29 mmol), and sodium tert-butyrate ( $t\text{-BuONa}$ ) (1.05 g, 10.94 mmol) in dry toluene (90 mL). The reaction mixture was stirred at  $90^{\circ}\text{C}$  overnight. The reaction mixture was cooled to room temperature and treated with water. The mixture was extracted with chloroform three times. The organic phases were collected, dried over  $\text{MgSO}_4$ , and concentrated under vacuum. The residue was purified by silica gel chromatography (eluent: dichloromethane/hexane = 3/7) to give desired compound as a light green solid in 91% yield (3.5 g).  $^1\text{H}$  NMR (500 MHz,  $\text{CDCl}_3$ )  $\delta$  7.28-7.28 (m, 2H), 7.20-7.08 (m, 17H), 7.00 (dd,  $J = 7.5, 1.7$  Hz, 2H), 6.88 (td,  $J = 7.8, 1.7$  Hz, 2H,  $\text{H}_c$ ), 6.82 (td,  $J = 7.4, 1.3$  Hz, 2H,  $\text{H}_b$ ), 6.16 (dd,  $J = 8.1, 1.3$  Hz, 2H,  $\text{H}_a$ ).  $^{13}\text{C}$  NMR (125 MHz,  $\text{CDCl}_3$ )  $\delta$  144.1, 144.0, 143.6, 143.2, 142.9, 142.1, 140.2, 138.9, 133.6, 131.4, 131.3, 131.3, 130.0, 127.9, 127.8, 127.6, 126.8, 126.7, 126.6, 122.4, 120.1, 117.8, 116.0. HRMS (ESI)  $m/z$  calcd.  $[\text{M}+\text{H}]^+$  for  $\text{C}_{38}\text{H}_{28}\text{NS}^+$  530.1937, found 530.1938.

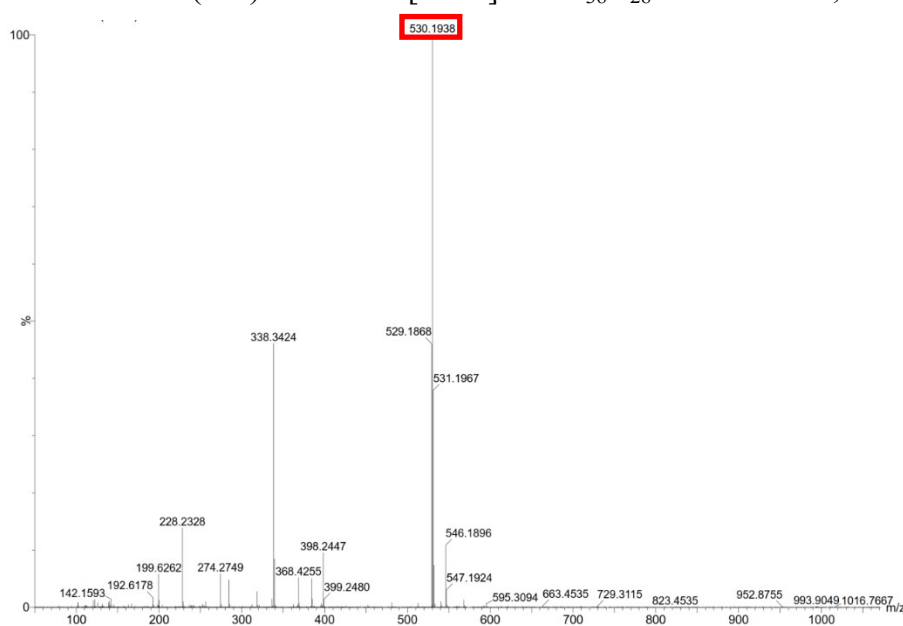

Fig.S1 HRMS Spectrum of TPE-PTZ

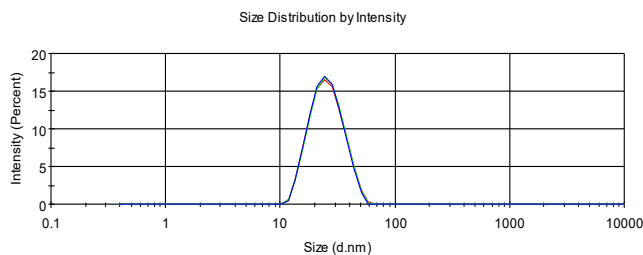

Fig.S2 Particle sizes of  $10^{-5}$  M TPE-PTZ in pure  $\text{CH}_3\text{CN}$  measured by DLS analysis.

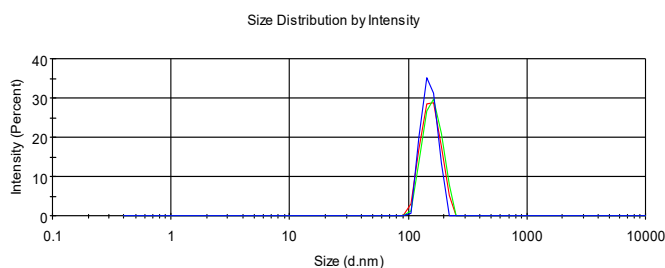

Fig.S3 Particle sizes of  $10^{-5}$  M TPE-PTZ in  $\text{CH}_3\text{CN}$ /water mixtures with 70% water fraction measured by DLS analysis.

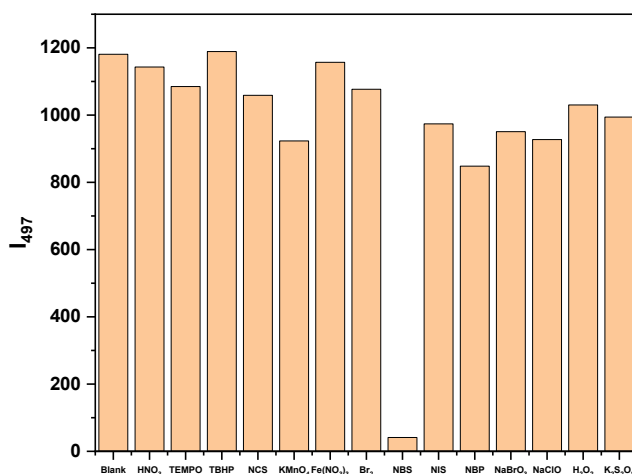

Fig.S4 Changes of fluorescence intensity ( $I_{497}$ ) of TPE-PTZ upon addition of various analytes.

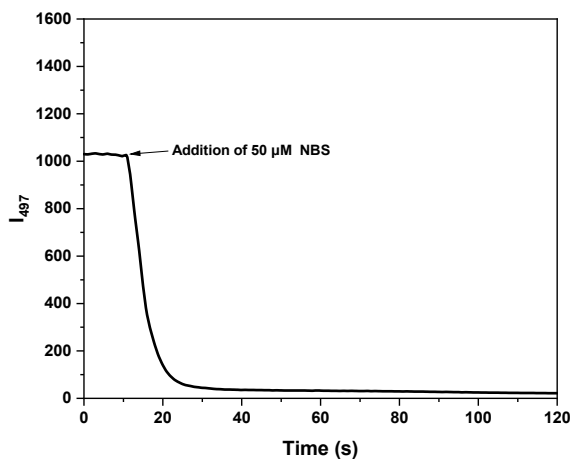

Fig.S5 The detection of response time of TPE-PTZ with  $50 \mu\text{M}$  NBS

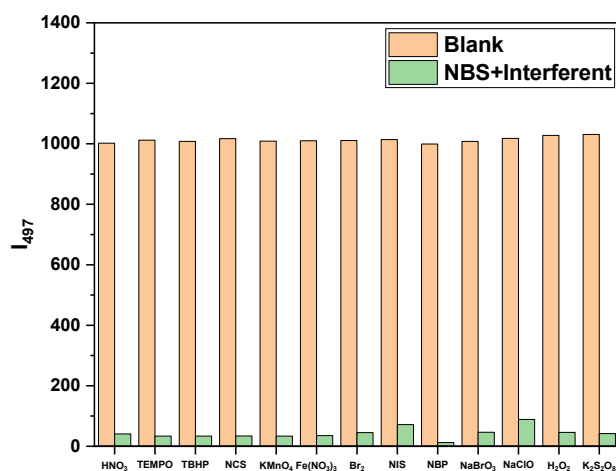

Fig.S6 Changes of fluorescence intensity ( $I_{497}$ ) of TPE-PTZ upon addition of NBS and various interferents.

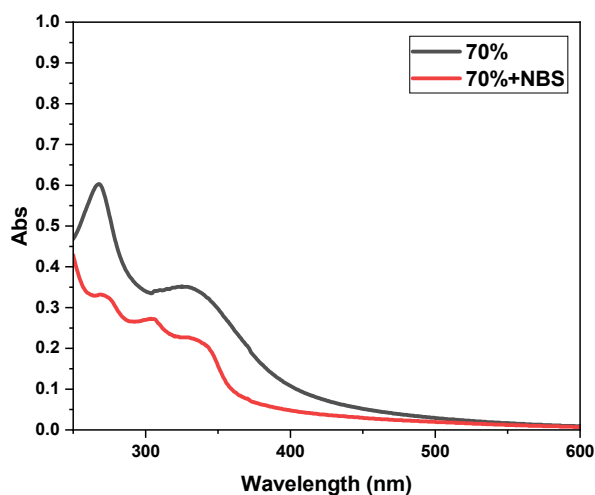

Fig.S7 UV-Vis absorption spectra of  $10^{-5}$  M TPE-PTZ in  $\text{CH}_3\text{CN}$ /water mixtures with 70% water before and after of NBS addition.

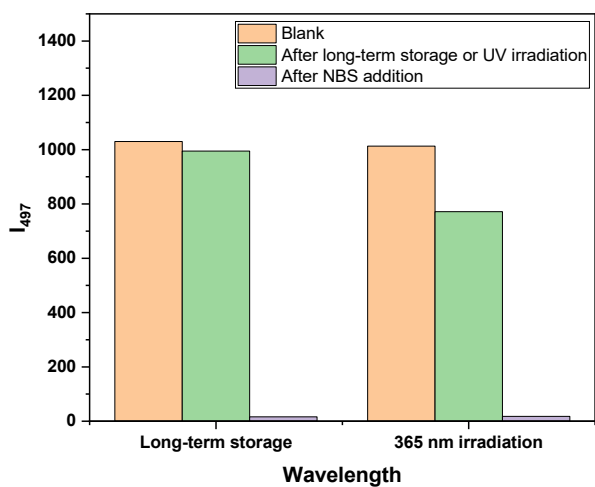

Fig.S8 Stability assessment experiment of the probe

### 1.3 Mechanism study.

Cyclic voltammetry experiments were conducted in dry acetonitrile with 2 mM TPE-PTZ and 0.1 M  $\text{NBu}_4\text{PF}_6$ . Working electrode: Glassy carbon electrode. Reference electrode: Ag/AgCl. Corresponding electrode: Platinum. Two pairs of reversible redox peaks were observed at +0.81 V and +1.54 V (vs. Ag/Ag<sup>+</sup>), which are assigned to two consecutive one-electron oxidation steps:  $\text{TPE-PTZ} \rightarrow \text{TPE-PTZ}^{\bullet+}$  (radical cation) and  $\text{TPE-PTZ}^{\bullet+} \rightarrow \text{TPE-PTZ}^{2+}$  (dication). These findings provide direct evidence for the generation of the  $\text{TPE-PTZ}^{2+}$  species upon NBS oxidation.

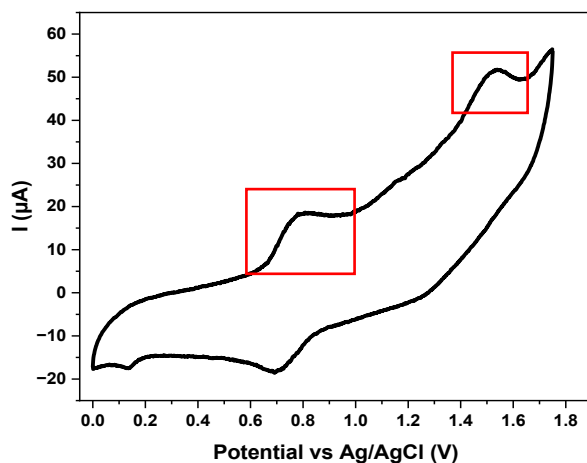

Fig.S9 Cyclic voltammetry traces of TPE-PTZ

HRMS analysis of TPE-PTZ after treatment with two equivalents of NBS revealed two distinct peaks at  $m/z = 529.1861$  and  $264.5935$ . The latter matches the dication species  $\text{TPE-PTZ}^{2+}$  (calcd for  $\text{C}_{38}\text{H}_{27}\text{NS}^{2+}/2$ :  $264.5927$ ), while the former corresponds to the radical cation  $\text{TPE-PTZ}^{\bullet+}$  (calcd for  $\text{C}_{38}\text{H}_{27}\text{NS}^{\bullet+}$ :  $529.1859$ ). The absence of any signal from the neutral species confirms complete oxidation to the radical cation and dication.

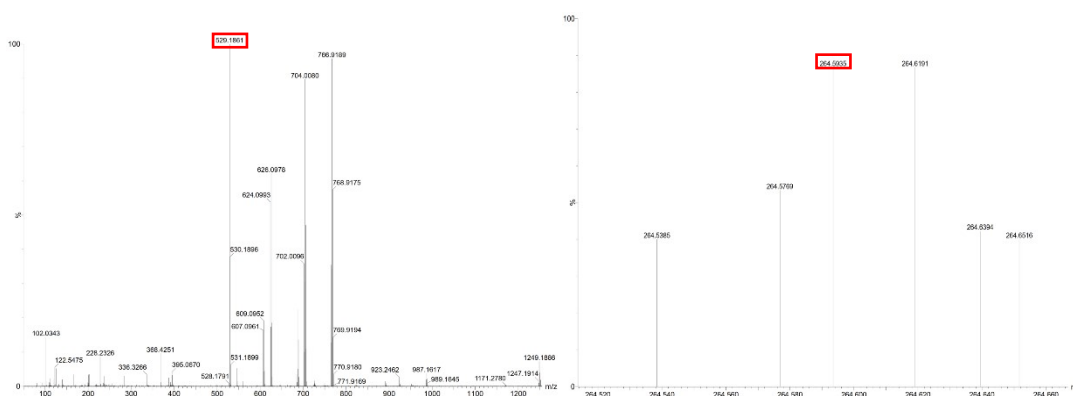

Fig.S10 HRMS Spectrum of  $\text{TPE-PTZ}^{\bullet+}$  and  $\text{TPE-PTZ}^{2+}$

| Sample        | NBS added/ $\mu\text{M}$ | Results/ $\mu\text{M}$ | Recovery<br>/% | RSD<br>/% (n = 3) |
|---------------|--------------------------|------------------------|----------------|-------------------|
| River water 1 | 12                       | 12.78                  | 106.5          | 0.86              |
| River water 2 | 18                       | 17.42                  | 96.7           | 0.96              |
| River water 3 | 32                       | 31.49                  | 98.4           | 0.99              |

Table S1. NBS detection results of TPE-PTZ in river water samples.

## 1.4 TD-DFT calculation

All the calculations were performed using Gaussian 16 software packages<sup>[1]</sup>. The geometry of all reactants were optimized using the M062X. In these geometry optimizations, basis set of 6-311+G(d,p) was used.

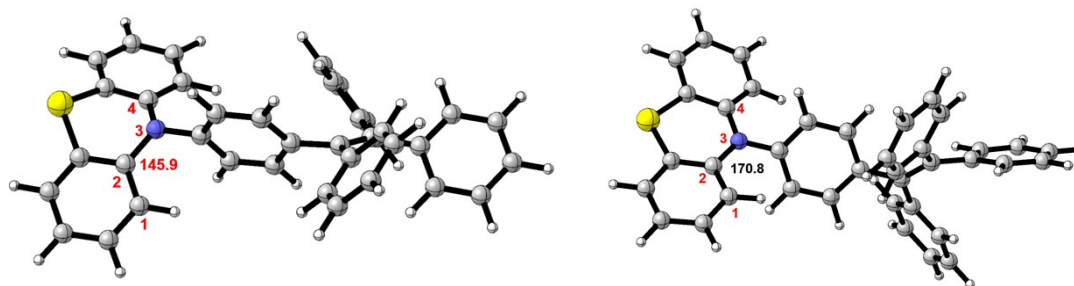

Fig.S11 The dihedral angles of TPE-PTZ and TPE-PTZ<sup>2+</sup>

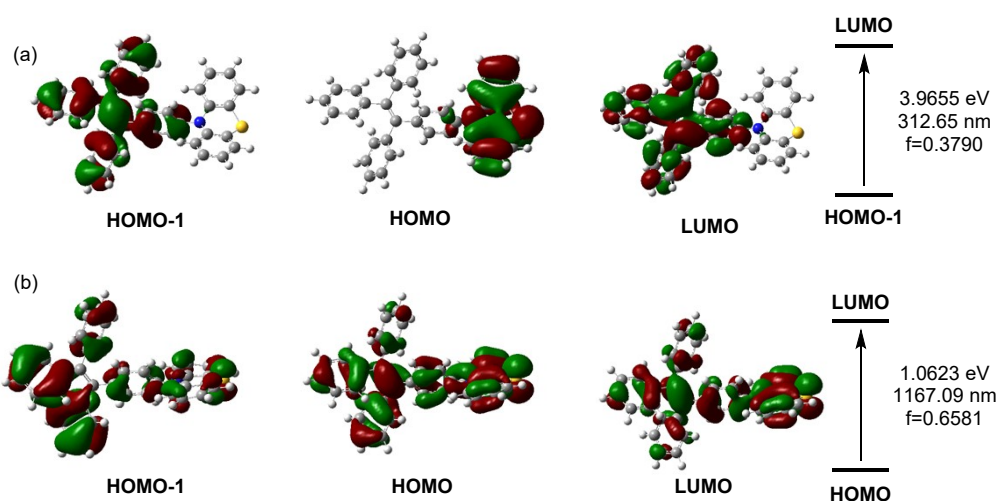

Fig. S12 Time dependent M062X/6-311+G(d,p) calculated frontier molecular orbitals, selected electronic transitions and oscillator strengths of TPE-PTZ(a) and TPE-PTZ<sup>2+</sup>(b)

### Coordinates:

#### TPE-PTZ

|   |            |             |             |
|---|------------|-------------|-------------|
| C | 4.99050900 | 3.49480300  | -0.92825200 |
| C | 3.62522100 | 3.37204100  | -0.71159700 |
| C | 3.05298800 | 2.12979000  | -0.45758200 |
| C | 3.83952500 | 0.97286900  | -0.43913200 |
| C | 5.21182200 | 1.10240000  | -0.69880700 |
| C | 5.78173500 | 2.35174000  | -0.91158800 |
| N | 3.28655600 | -0.30849400 | -0.19363000 |
| C | 4.03314700 | -1.28540900 | 0.50813500  |
| C | 5.42286800 | -1.36159700 | 0.33503100  |
| S | 6.20891600 | -0.34871200 | -0.88564300 |

|   |             |             |             |
|---|-------------|-------------|-------------|
| C | 3.42313100  | -2.20882000 | 1.36290900  |
| C | 4.18050900  | -3.16538500 | 2.03105300  |
| C | 5.55988100  | -3.20743800 | 1.88385800  |
| C | 6.17733600  | -2.29270700 | 1.03811000  |
| C | 1.85658500  | -0.40734400 | -0.15054100 |
| C | 1.13937400  | 0.03217100  | 0.96125800  |
| C | -0.24577700 | -0.02304300 | 0.95706200  |
| C | -0.93683800 | -0.52331900 | -0.15247900 |
| C | -0.20409800 | -1.01405300 | -1.23483400 |
| C | 1.18508500  | -0.94240400 | -1.24218500 |
| C | -2.42733900 | -0.53438200 | -0.18359700 |
| C | -3.15083700 | 0.56902100  | 0.12057800  |
| C | -3.04454100 | -1.82947900 | -0.58560100 |
| C | -4.62927900 | 0.53968800  | 0.30499300  |
| C | -2.51686000 | 1.90823400  | 0.29643700  |
| C | -4.06777400 | -1.87964500 | -1.53734800 |
| C | -4.62470300 | -3.09520200 | -1.91386500 |
| C | -4.16903100 | -4.28088400 | -1.34456200 |
| C | -3.14124700 | -4.24415600 | -0.40738300 |
| C | -2.57576900 | -3.02866100 | -0.04026700 |
| C | -5.42951200 | 1.52174300  | -0.28683800 |
| C | -6.80993400 | 1.50329300  | -0.12528700 |
| C | -7.40889900 | 0.51677800  | 0.65211000  |
| C | -6.61852400 | -0.44910000 | 1.26842200  |
| C | -5.24017000 | -0.43834800 | 1.09562000  |
| C | -2.83399300 | 2.69628100  | 1.40654700  |
| C | -2.23198400 | 3.93565700  | 1.59109400  |
| C | -1.02742700 | 3.65664900  | -0.47340900 |
| C | -1.61837400 | 2.41147100  | -0.64958600 |
| C | -1.32428700 | 4.41865700  | 0.65321200  |
| H | 5.43788700  | 4.46324700  | -1.11272600 |
| H | 2.98911600  | 4.24905800  | -0.72698900 |
| H | 1.98714900  | 2.06552300  | -0.28568400 |
| H | 6.84954700  | 2.41679600  | -1.08560000 |
| H | 2.35041600  | -2.19221600 | 1.49724100  |
| H | 3.67907600  | -3.87511500 | 2.67790900  |
| H | 6.15131900  | -3.94334100 | 2.41365500  |
| H | 7.25205600  | -2.30812300 | 0.89850300  |
| H | 1.67665300  | 0.42943400  | 1.81601900  |
| H | -0.80573300 | 0.34192900  | 1.81036400  |
| H | -0.72941000 | -1.43355600 | -2.08610700 |
| H | 1.76072600  | -1.29127100 | -2.09130000 |
| H | -4.42756100 | -0.95680000 | -1.97796700 |
| H | -5.41478200 | -3.11701700 | -2.65512000 |

|   |             |             |             |
|---|-------------|-------------|-------------|
| H | -4.60610100 | -5.22831200 | -1.63663400 |
| H | -2.77540900 | -5.16348400 | 0.03447400  |
| H | -1.76522000 | -3.00274400 | 0.68032100  |
| H | -4.96197300 | 2.29981400  | -0.88084400 |
| H | -7.41768800 | 2.26321100  | -0.60219300 |
| H | -8.48429200 | 0.50579600  | 0.78418900  |
| H | -7.07620200 | -1.21209400 | 1.88691900  |
| H | -4.62643200 | -1.19513100 | 1.57099700  |
| H | -3.55163400 | 2.32633400  | 2.13125000  |
| H | -2.47556700 | 4.52729600  | 2.46568000  |
| H | -0.33826000 | 4.03412400  | -1.22022100 |
| H | -1.38115400 | 1.81639600  | -1.52441300 |
| H | -0.86018900 | 5.38764200  | 0.79383100  |

**TPE-PTZ<sup>2+</sup>**

|   |             |             |             |
|---|-------------|-------------|-------------|
| C | 5.43895500  | 0.84766900  | -3.42133300 |
| C | 4.04692800  | 1.01589200  | -3.35446700 |
| C | 3.35911800  | 0.71464600  | -2.20295600 |
| C | 4.02858900  | 0.20055800  | -1.06928900 |
| C | 5.44258500  | 0.16002500  | -1.10812500 |
| C | 6.12757800  | 0.45626500  | -2.29737500 |
| N | 3.30086600  | -0.18570800 | 0.06987600  |
| C | 3.89383200  | -0.52814400 | 1.29775500  |
| C | 5.28515600  | -0.40056100 | 1.52263700  |
| S | 6.43808700  | -0.08742000 | 0.27852400  |
| C | 3.11390800  | -1.08926900 | 2.33438800  |
| C | 3.66188600  | -1.35699500 | 3.56636000  |
| C | 5.02008200  | -1.10425900 | 3.81573900  |
| C | 5.82484600  | -0.66234700 | 2.79220800  |
| C | 1.90005000  | -0.22990500 | -0.02378200 |
| C | 1.10243700  | 0.47444400  | 0.90610800  |
| C | -0.26112600 | 0.46138800  | 0.78653600  |
| C | -0.91183300 | -0.32362100 | -0.21121500 |
| C | -0.08460200 | -1.06591100 | -1.10199500 |
| C | 1.28307900  | -0.98136700 | -1.04518800 |
| C | -2.34382000 | -0.44131800 | -0.27703100 |
| C | -3.19937000 | 0.62111400  | 0.12458200  |
| C | -2.91618800 | -1.69812000 | -0.78808100 |
| C | -4.56714300 | 0.37339500  | 0.54203800  |
| C | -2.74138100 | 2.00557900  | 0.07261200  |
| C | -3.99427200 | -1.67980900 | -1.68969300 |
| C | -4.52458200 | -2.86535100 | -2.17157100 |
| C | -4.00597000 | -4.08729900 | -1.74473600 |
| C | -2.94271700 | -4.12090800 | -0.84408100 |

|   |             |             |             |
|---|-------------|-------------|-------------|
| C | -2.39162600 | -2.93692600 | -0.37937900 |
| C | -5.58126200 | 1.30940900  | 0.23729400  |
| C | -6.88674000 | 1.08085300  | 0.63352400  |
| C | -7.19901500 | -0.06123100 | 1.37093600  |
| C | -6.20513600 | -0.98664500 | 1.70146200  |
| C | -4.90675800 | -0.78497200 | 1.27822800  |
| C | -3.13152300 | 2.91917300  | 1.07359200  |
| C | -2.68458400 | 4.22895000  | 1.03593200  |
| C | -1.51515500 | 3.77759200  | -1.03596000 |
| C | -1.92748500 | 2.45754200  | -0.98636300 |
| C | -1.88158100 | 4.66127200  | -0.02003200 |
| H | 5.97536300  | 1.07408200  | -4.33400100 |
| H | 3.50853200  | 1.40857700  | -4.20751600 |
| H | 2.29554100  | 0.89503800  | -2.16776400 |
| H | 7.20977100  | 0.39285400  | -2.30884500 |
| H | 2.07749100  | -1.33504600 | 2.16019000  |
| H | 3.04143200  | -1.78954900 | 4.34076100  |
| H | 5.44501400  | -1.30507500 | 4.79097500  |
| H | 6.89027000  | -0.53342500 | 2.94586500  |
| H | 1.57828500  | 1.05737600  | 1.68548900  |
| H | -0.85461300 | 1.03255000  | 1.48847900  |
| H | -0.54541500 | -1.68633100 | -1.85984400 |
| H | 1.89471300  | -1.53033700 | -1.75125700 |
| H | -4.40036400 | -0.73130300 | -2.02262200 |
| H | -5.34320200 | -2.84128600 | -2.87999000 |
| H | -4.43235800 | -5.01297200 | -2.11181100 |
| H | -2.55183300 | -5.07087800 | -0.50122000 |
| H | -1.57791000 | -2.96394100 | 0.33759100  |
| H | -5.33986500 | 2.18608600  | -0.35196600 |
| H | -7.66441900 | 1.78597000  | 0.36866700  |
| H | -8.22041800 | -0.23310600 | 1.68942800  |
| H | -6.45363900 | -1.86115200 | 2.28929600  |
| H | -4.13596800 | -1.49895800 | 1.54084600  |
| H | -3.75087400 | 2.57710400  | 1.89473800  |
| H | -2.96446600 | 4.91846800  | 1.82254900  |
| H | -0.92401500 | 4.13028000  | -1.87193700 |
| H | -1.67141200 | 1.77603500  | -1.78929800 |
| H | -1.55204200 | 5.69276700  | -0.05799600 |

## Part II NMR spectra

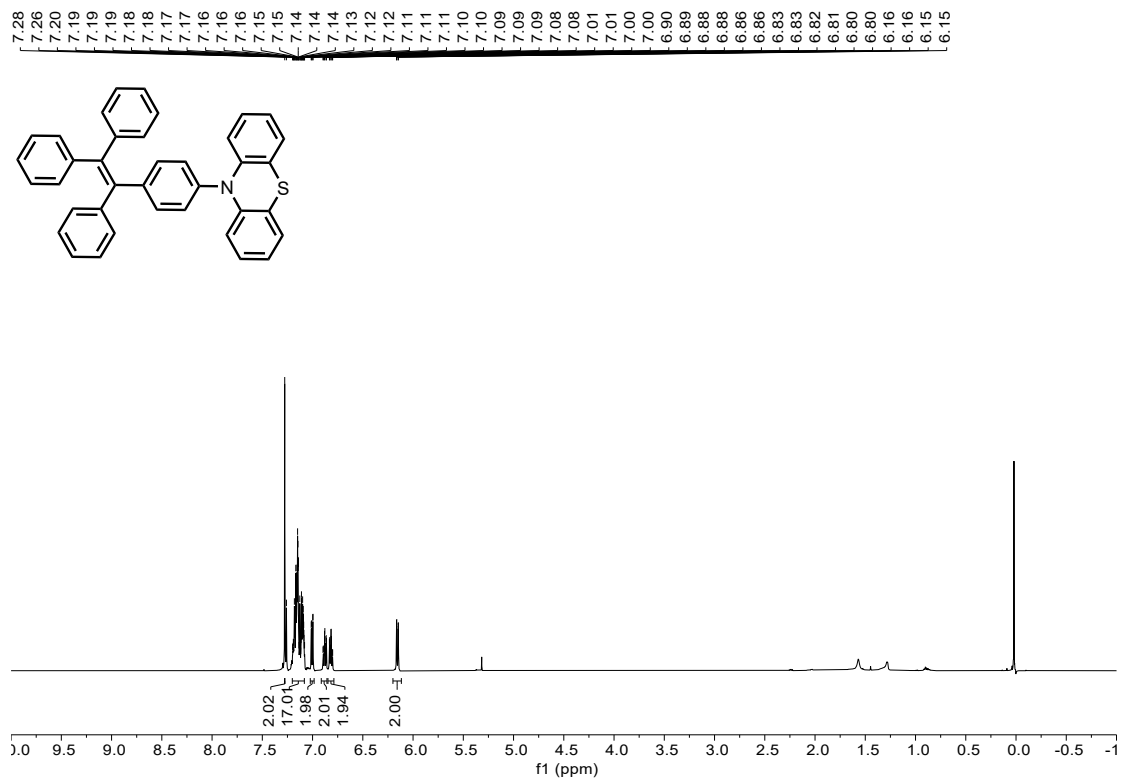

<sup>1</sup>H NMR of TPE-PTZ

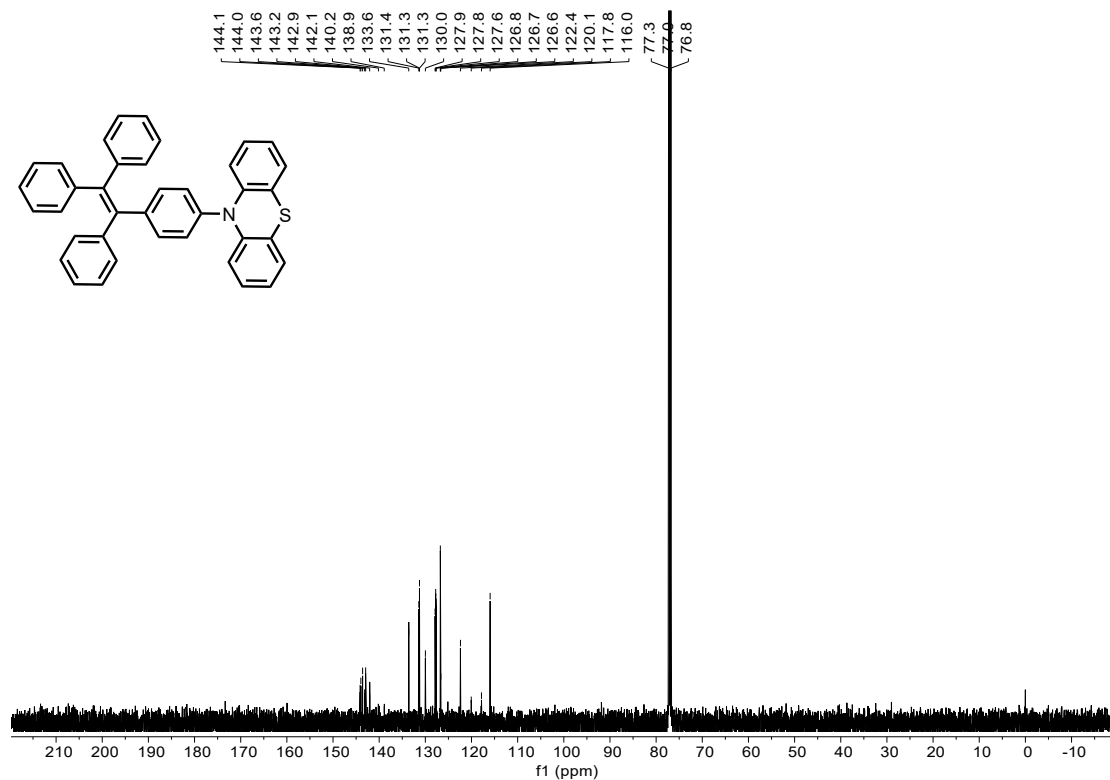

<sup>13</sup>C NMR of TPE-PTZ

## Reference:

[1] M. J. Frisch, G. W. Trucks, H. B. Schlegel, G. E. Scuseria, M. A. Robb, J. R. Cheeseman, G. Scalmani, V. Barone, G. A. Petersson, H. Nakatsuji, X. Li, M. Caricato, A. V. Marenich, J. Bloino, B. G. Janesko, R. Gomperts, B. Mennucci, H. P. Hratchian, J. V. Ortiz, A. F. Izmaylov, J. L. Sonnenberg, D. Williams-Young, F. Ding, F. Lipparini, F. Egidi, J. Goings, B. Peng, A. Petrone, T. Henderson, D. Ranasinghe, V. G. Zakrzewski, J. Gao, N. Rega, G. Zheng, W. Liang, M. Hada, M. Ehara, K. Toyota, R. Fukuda, J. Hasegawa, M. Ishida, T. Nakajima, Y. Honda, O. Kitao, H. Nakai, T. Vreven, K. Throssell, J. A. Montgomery, Jr., J. E. Peralta, F. Ogliaro, M. J. Bearpark, J. J. Heyd, E. N. Brothers, K. N. Kudin, V. N. Staroverov, T. A. Keith, R. Kobayashi, J. Normand, K. Raghavachari, A. P. Rendell, J. C. Burant, S. S. Iyengar, J. Tomasi, M. Cossi, J. M. Millam, M. Klene, C. Adamo, R. Cammi, J. W. Ochterski, R. L. Martin, K. Morokuma, O. Farkas, J. B. Foresman, D. J. Fox, Gaussian 16, Revision C.01, Gaussian, Inc., Wallingford CT 2016.
